# Supplementary material
Source: Springer Nature journal article supplement (https://www.springermedizin.de/resource/supplementary/12879_2011_2071_MOESM5_ESM.pdf/9443634)

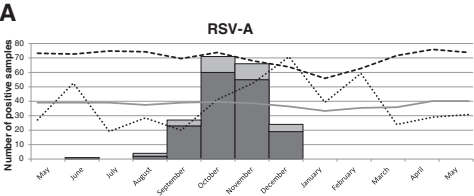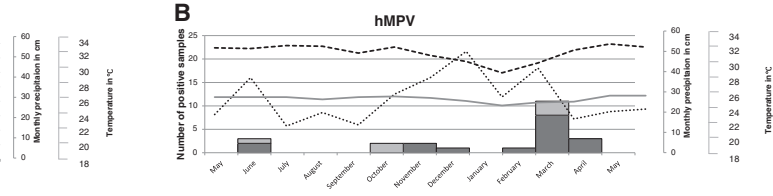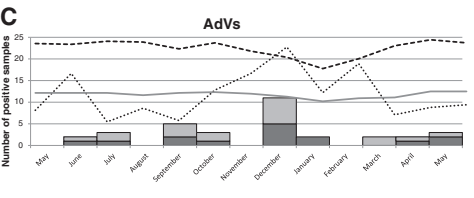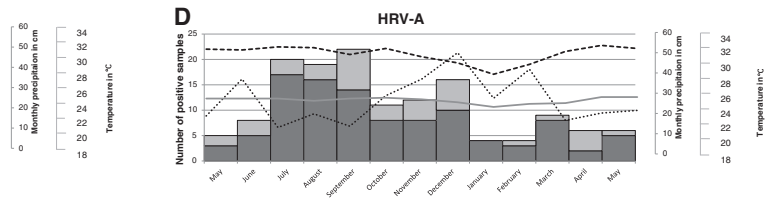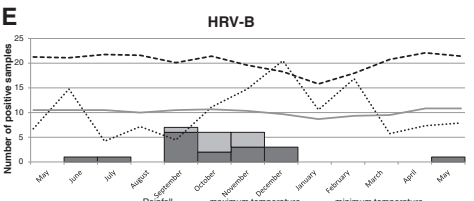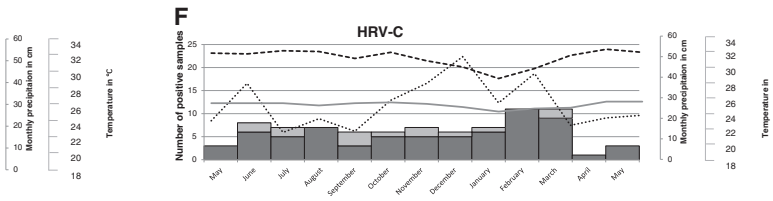

- - - - - Rainfall    - - - - - maximum temperature    — minimum temperature  
 ■ Single    ■ Multiple

Supplement: MOESM5 [file 9443634]
